# Supplementary material for: Chitin Deacetylase, a Novel Target for the Design of Agricultural Fungicides
Source: MDPI journal article supplement (doi:10.3390/jof7121009), 2021-11-25
Supplement: s1 [file s1]

**Table S1.** Primers used in this study.

| Primer name                                                    | Sequence (5' - 3') <sup>1</sup>                  |
|----------------------------------------------------------------|--------------------------------------------------|
| <i>Plasmid construction</i>                                    |                                                  |
| PxCDAsi-F                                                      | <u>AAAAAGCAGGCTCT</u> CGGCCCAAGTATTGGAAGCTGTGCTG |
| PxCDAsi-R                                                      | <u>AGAAAGCTGGGTGCTGTTACTGCCCTGTAGCCCGAAGAC</u>   |
| CERK1si-F                                                      | <u>AAAAAGCAGGCTCT</u> GGGAGGGTGCCAATTTGTCTTTTCG  |
| CERK1si-R                                                      | <u>AGAAAGCTGGGTGT</u> GGCACCTACTACAAGGAGAAACC    |
| attB1                                                          | GGGGACAAGTTTGTACAAAAAAGCAGGCT                    |
| attB2                                                          | GGGGACCACTTTGTACAAGAAAGCTGGGT                    |
| <i>Expression analysis of HIGS constructs and target genes</i> |                                                  |
| CDA-HIGS-F                                                     | CGGCCCAAGTATTGGAAGCTGTGCTG                       |
| CDA-HIGS-R                                                     | CTGTTACTGCCCTGTAGCCCGAAGAC                       |
| CERK1-HIGS-F                                                   | GGGAGGGTGCCAATTTGTCTTTTCG                        |
| CERK1-HIGS-R                                                   | GGCACCTACTACAAGGAGAAACC                          |
| ACT7-F                                                         | TCATGGTGGGTATGGGCCAGAAAG                         |
| ACT7-R                                                         | TACAGTGATAGAACGGCCTGGATG                         |
| CDA1-F                                                         | ATGCAGATGTTAAATTTGGCACGTACGG                     |
| CDA1-R                                                         | TGTATAAGAGATGACCACTGAC                           |
| CDA2-F                                                         | ATGCAGATGTTAAATTTGGCACGTACGG                     |
| CDA2-R                                                         | TGTCCACTGGTATTTGTAGTGTC                          |
| TUB2-F                                                         | GATTTAGAGCCCGGAACAATGGACG                        |
| TUB2-R                                                         | CACATCCTTCAGCTTCACGCCGAAC                        |
| CERK1-F                                                        | TGGTCAAGGTGATGGTGGTATAGC                         |
| CERK1-R                                                        | TCGACCTGTGCCTCGTAAATGTTG                         |

<sup>1</sup>Underlined sequence is the adapter for attB1 or attB2 primers
